# Supplementary material for: Isolation and biosynthesis of labdanmycins: four new labdane diterpenes from endophyticStreptomyces
Source: Royal Society of Chemistry journal article supplement (doi:10.1039/c8qo00085a), 2018-01-01
Supplement: c8qo00085a1.pdf [file c8qo00085a1.pdf]

## Supplementary Information

### Isolation and Biosynthesis of Labdanmycins: New Labdane Diterpenes from Endophytic *Streptomyces*

Zi-Jun Xiong<sup>a, b, †</sup> Jianping Huang<sup>a, †</sup> Yijun Yan,<sup>a</sup> Li Wang,<sup>a, b</sup> Zhiyan Wang,<sup>a, b</sup> Jing Yang,<sup>a</sup> Jianying Luo,<sup>a</sup> Jie Li<sup>a</sup> and Sheng-Xiong Huang<sup>a, \*</sup>

<sup>a</sup>State Key Laboratory of Phytochemistry and Plant Resources in West China, CAS Center for Excellence in Molecular Plant Sciences, Kunming Institute of Botany, Chinese Academy of Sciences, Kunming 650204, China.

<sup>b</sup>University of the Chinese Academy of Sciences, Beijing 100049, China.

<sup>†</sup>These authors contributed equally to this work.

\*Corresponding author, S.-X. Huang, E-mail: [sxhuang@mail.kib.ac.cn](mailto:sxhuang@mail.kib.ac.cn).

## Contents of Supporting Information

| No. | Contents                                                                                                                              | P. |
|-----|---------------------------------------------------------------------------------------------------------------------------------------|----|
| 1   | Tab. S1. Homologous genes and proposed function of genes in labdanmycins biosynthetic gene cluster of <i>Streptomyces</i> sp. KIB 015 | 3  |
| 2   | Tab. S2. Strains and plasmids used and generated in this study                                                                        | 4  |
| 3   | Tab. S3. Primers used for screening genomic library, constructing and confirming the mutants.                                         | 5  |
| 4   | Fig. S1. Gene replacement of <i>labB</i> and <i>labE</i> using the PCR-targeting method                                               | 5  |
| 5   | Fig. S2. <sup>1</sup> H NMR spectrum of compound <b>1</b>                                                                             | 6  |
| 6   | Fig. S3. <sup>13</sup> C NMR spectrum of compound <b>1</b>                                                                            | 6  |
| 7   | Fig. S4. HMQC spectrum of compound <b>1</b>                                                                                           | 7  |
| 8   | Fig. S5. HMBC spectrum of compound <b>1</b>                                                                                           | 7  |
| 9   | Fig. S6. <sup>1</sup> H- <sup>1</sup> H COSY spectrum of compound <b>1</b>                                                            | 8  |
| 10  | Fig. S7. ROESY spectrum of compound <b>1</b>                                                                                          | 8  |
| 11  | Fig. S8. <sup>1</sup> H NMR spectrum of compound <b>2</b>                                                                             | 9  |
| 12  | Fig. S9. <sup>13</sup> C NMR spectrum of compound <b>2</b>                                                                            | 9  |
| 13  | Fig. S10. <sup>1</sup> H NMR spectrum of compound <b>3</b>                                                                            | 10 |
| 14  | Fig. S11. <sup>13</sup> C NMR spectrum of compound <b>3</b>                                                                           | 10 |
| 15  | Fig. S12. <sup>1</sup> H NMR spectrum of compound <b>4</b>                                                                            | 11 |
| 16  | Fig. S13. <sup>13</sup> C NMR spectrum of compound <b>4</b>                                                                           | 11 |
| 17  | Fig. S14. HSQC spectrum of compound <b>4</b>                                                                                          | 12 |
| 18  | Fig. S15. HMBC spectrum of compound <b>4</b>                                                                                          | 12 |
| 19  | Fig. S16. <sup>1</sup> H- <sup>1</sup> H COSY spectrum of compound <b>4</b>                                                           | 13 |
| 20  | Fig. S17. ROESY spectrum of compound <b>4</b>                                                                                         | 13 |
| 21  | Fig. S18. <sup>1</sup> H NMR spectrum of compound <b>5</b>                                                                            | 14 |
| 22  | Fig. S19. <sup>13</sup> C NMR spectrum of compound <b>5</b>                                                                           | 14 |
| 23  | Fig. S20. HSQC spectrum of compound <b>5</b>                                                                                          | 15 |
| 24  | Fig. S21. HMBC spectrum of compound <b>5</b>                                                                                          | 15 |
| 25  | Fig. S22. <sup>1</sup> H- <sup>1</sup> H COSY spectrum of compound <b>5</b>                                                           | 16 |
| 26  | Fig. S23. ROESY spectrum of compound <b>5</b>                                                                                         | 16 |

**Tab. S1.** Homologous genes and proposed function of genes in labdanmycins biosynthetic gene cluster of *Streptomyces* sp. KIB 015

| NO.         | Size<br>aa | Proposed function by a BLAST search (blastp)                            | Identity/<br>positive | Accession number |
|-------------|------------|-------------------------------------------------------------------------|-----------------------|------------------|
| <i>orf1</i> | 471        | AraC family transcriptional regulator [ <i>Streptomyces niveus</i> ]    | 90%/92%               | WP_069625743.1   |
| <i>orf2</i> | 125        | pyridoxamine 5'-phosphate oxidase [ <i>Streptomyces</i> sp. AcH505]     | 91%/95%               | KIF71030.1       |
| <i>orf3</i> | 465        | ATP-binding protein [ <i>Streptomyces niveus</i> ]                      | 85%/90%               | WP_023536773.1   |
| <i>orf4</i> | 139        | dynein regulation protein LC7 [ <i>Streptomyces</i> sp. 1]              | 57%/70%               | WP_099897893.1   |
| <i>orf5</i> | 128        | DUF742 domain-containing protein [ <i>Streptomyces niveus</i> ]         | 97%/97%               | WP_078074393.1   |
| <i>orf6</i> | 194        | GTPase [ <i>Streptomyces</i> sp. Ncost-T10-10d]                         | 81%/89%               | SCF65553.1       |
| <i>labE</i> | 436        | cytochrome P450 [ <i>Streptomyces niveus</i> ]                          | 96%/97%               | WP_078074391.1   |
| <i>labA</i> | 348        | geranylgeranyl diphosphate synthase [ <i>Streptomyces niveus</i> ]      | 94%/96%               | WP_078074390.1   |
| <i>labB</i> | 553        | labdadienyl diphosphate synthase [ <i>Streptomyces anulatus</i> ]       | 76%/82%               | BAR97461.1       |
| <i>labC</i> | 453        | cytochrome P450 [ <i>Streptomyces niveus</i> ]                          | 93%/97%               | WP_078074388.1   |
| <i>labD</i> | 321        | labdatriene synthase [ <i>Streptomyces anulatus</i> ]                   | 76%/83%               | BAR97463.1       |
| <i>orf1</i> | 334        | transcriptional regulator [ <i>Streptomyces niveus</i> ]                | 97%/98%               | WP_078074386.1   |
| <i>orf1</i> | 469        | N-acetylmuramoyl-L-alanine amidase [ <i>Streptomyces niveus</i> ]       | 95%/97%               | WP_078079387.1   |
| <i>orf1</i> | 258        | M23 family peptidase [ <i>Streptomyces niveus</i> ]                     | 98%/100%              | WP_078074385.1   |
| <i>orf1</i> | 161        | DUF456 domain-containing protein [ <i>Streptomyces anulatus</i> ]       | 69%/80%               | WP_057666569.1   |
| <i>orf1</i> | 334        | luxR-family transcriptional regulator [ <i>Streptomyces laurentii</i> ] | 81%/88%               | BAU86910.1       |

**Tab. S2.** Strains and plasmids used and generated in this study.

| Strains/Plasmids                    | Characteristic(s)                                                                                             | Sources              |
|-------------------------------------|---------------------------------------------------------------------------------------------------------------|----------------------|
| <b><i>E. coli</i></b>               |                                                                                                               |                      |
| DH5 $\alpha$                        | Host strain for cloning                                                                                       | Invitrogen           |
| BL21(DE3)                           | Host strain for protein expression                                                                            | Novagen              |
| XL1-Blue MR                         | Host for constructing genomic library                                                                         | Agilent Technologies |
| BW25113/pIJ790                      | Host strain for PCR targeting                                                                                 | Ref. 1               |
| ET12567/pUZ8002                     | Donor strain for conjugation                                                                                  | Ref. 1               |
| <b><i>Streptomyces</i></b>          |                                                                                                               |                      |
| <i>S. sp.</i> KIB 015               | Wild type, Diterpene producer                                                                                 | This study           |
| <i>S. sp.</i> KIB 015 $\Delta labB$ | The <i>labB</i> gene disrupted mutant of KIB 015                                                              | This study           |
| <i>S. sp.</i> KIB 015 $\Delta labE$ | The <i>labE</i> gene disrupted mutant of KIB 015                                                              | This study           |
| <i>S. albus</i> J1074               | Host strain for heterologous expression                                                                       | Ref. 2               |
| <i>S. coelicolor</i> M1154          | Host strain for heterologous expression                                                                       | Ref. 3               |
| <i>S. albus</i> 9B5                 | <i>S. albus</i> J1074 integrated with pJTU2554-9B5 which contains labdanmycins biosynthetic gene cluster      | This study           |
| <i>S. coelicolor</i> 9B5            | <i>S. coelicolor</i> M1154 integrated with pJTU2554-9B5 which contains labdanmycins biosynthetic gene cluster | This study           |
| <b>Plasmids</b>                     |                                                                                                               |                      |
| pSupercos-1                         | Kan <sup>r</sup> , Cosmid vector for genomic library construction                                             | Stratagene           |
| 19A10                               | Kan <sup>r</sup> , Cosmid pSupercos-1 which contains labdanmycins biosynthetic gene cluster                   | This study           |
| 19A10 $\Delta labB$                 | Kan <sup>r</sup> , gene inactivation clone used for <i>labB</i> mutant                                        | This study           |
| 19A10 $\Delta labE$                 | Kan <sup>r</sup> , gene inactivation clone used for <i>labE</i> mutant                                        | This study           |
| pJTU2554                            | Apr <sup>r</sup> , Cosmid vector for genomic library construction                                             | Ref. 4               |
| 9B5                                 | Apr <sup>r</sup> , Cosmid pJTU2554 which contains labdanmycins biosynthetic gene cluster                      | This study           |

**Tab. S3.** Primers used in this study

| Primers                       | Targeted genes | Sequences                                                         |
|-------------------------------|----------------|-------------------------------------------------------------------|
| for screening genomic library |                |                                                                   |
| SG-F                          | <i>labD</i>    | 5'-TGAGTGCGTCCACCTCCTCG-3'                                        |
| SG-R                          |                | 5'-GCAGTGACGGCAGGTTGAGC-3'                                        |
| For PCR targeting             |                |                                                                   |
| Tar- <i>labE</i> -F           | <i>labE</i>    | 5'-GTGAGTATCACACCACCGGACGTCACCGCTGTGCCCTGttccgggatccgtcgacc-3'    |
| Tar- <i>labE</i> -R           |                | 5'-CTAGGAAGTCGTCACCGACATACGGTTCGCCTGCCGTCGAtgtaggctggagctgcttc-3' |
| Tar- <i>labB</i> -F           | <i>labB</i>    | 5'-ATGACCGCCCCGCCGACCCCGTCACCGCAACCGTGAGGttccgggatccgtcgacc-3'    |
| Tar- <i>labB</i> -R           |                | 5'-TCATGCGTCCGTCCTACCTCCGCGTCTGTGGGTGCGTTttaggctggagctgcttc-3'    |
| For gene validation           |                |                                                                   |
| Che- <i>labE</i> -F           | <i>labE</i>    | 5'- GTGAGTATCACACCACCG -3'                                        |
| Che- <i>labE</i> -R           |                | 5'- CTAGGAAGTCGTCACCGAC -3'                                       |
| Che- <i>labB</i> -F           | <i>labB</i>    | 5'- ATGACCGCCCCGCCGACC -3'                                        |
| Che- <i>labB</i> -R           |                | 5'- TCATGCGTCCGTCCTACC -3'                                        |

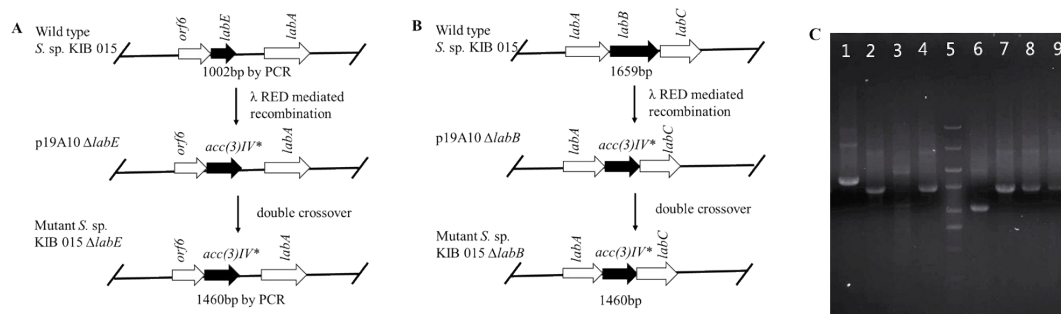

**Fig. S1.** Gene replacement of *labB* and *labE* using the PCR-targeting method. (A) Scheme for the construction of *labE* replacement mutant. (*acc(3)IV\** included *acc(3)IV* and *OriT*.) (B) Scheme for the construction of *labB* replacement mutant. (*acc(3)IV\** included *acc(3)IV* and *OriT*.) (C) Gel electrophoresis of PCR products. Lane 1: *labB* (*S. sp. KIB 015*), 1659 bp; Lane 2-4:  $\Delta labB$ , 1460 bp; Lane 5: DNA molecular ladder (5000 bp, 3000 bp, 2000 bp, 1500 bp, 1000 bp, 750 bp, 500 bp, 250 bp). Lane 6: *labE* (*S. sp. KIB 015*), 1002 bp; Lane 7-9:  $\Delta labE$ , 1460 bp;

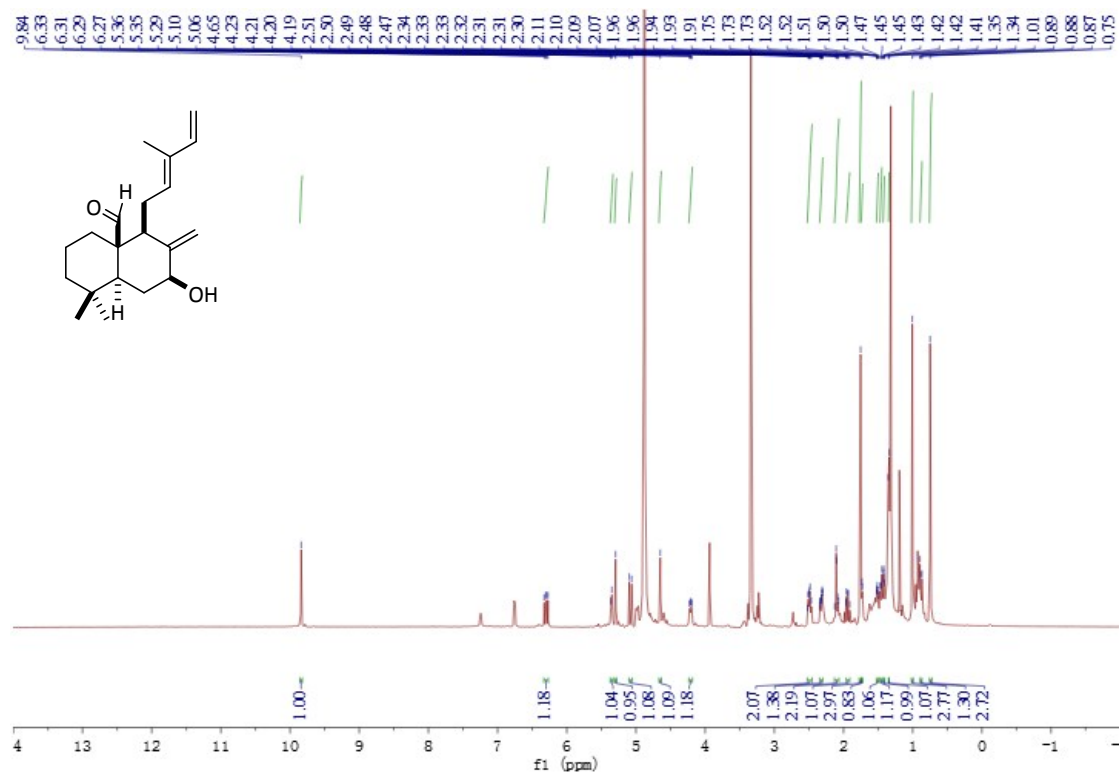

Fig. S2. <sup>1</sup>H NMR spectrum (CD<sub>3</sub>OD, 500 MHz) of compound 1

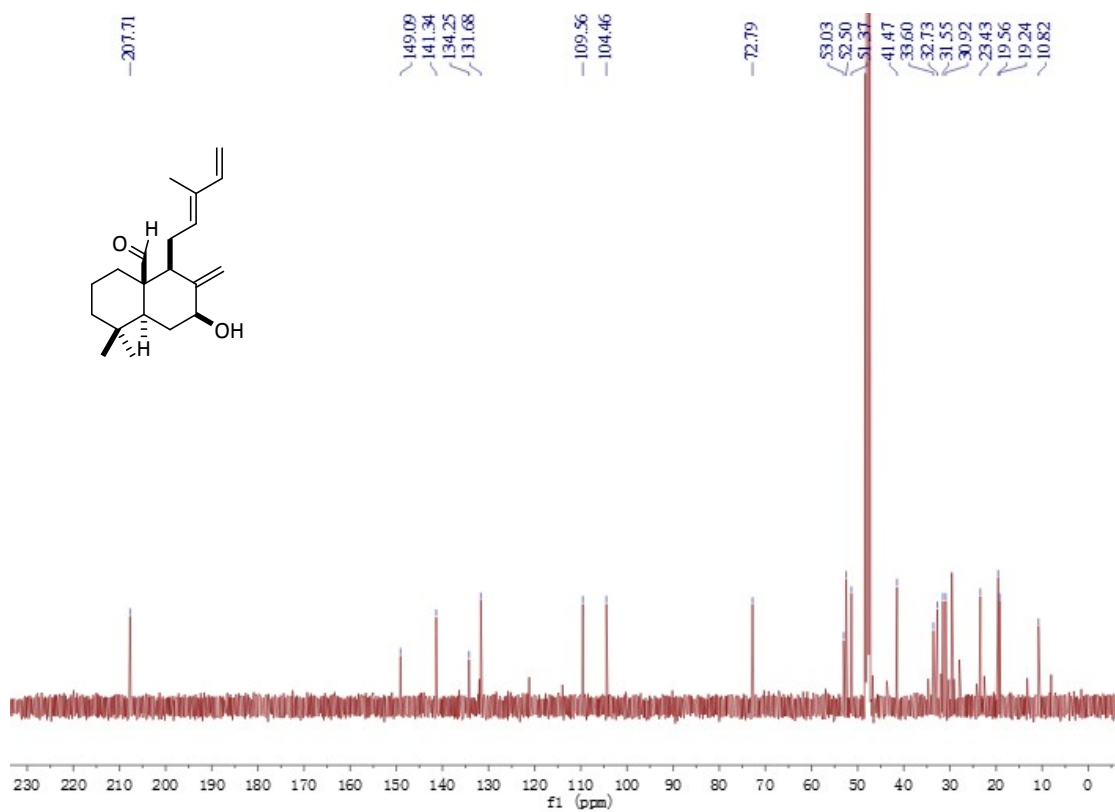

**Fig. S3.**  $^{13}\text{C}$  NMR spectrum ( $\text{CD}_3\text{OD}$ , 125 MHz) of compound **1**

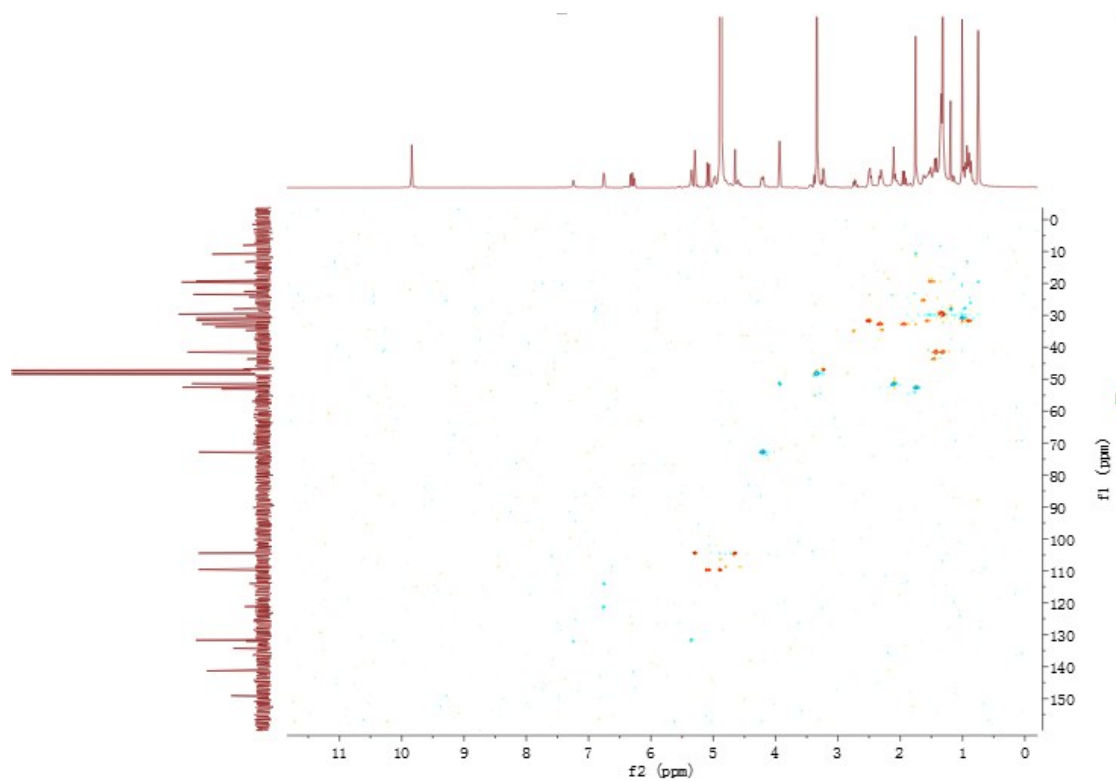

**Fig. S4.** HMQC spectrum of compound **1** (in  $\text{CD}_3\text{OD}$ )

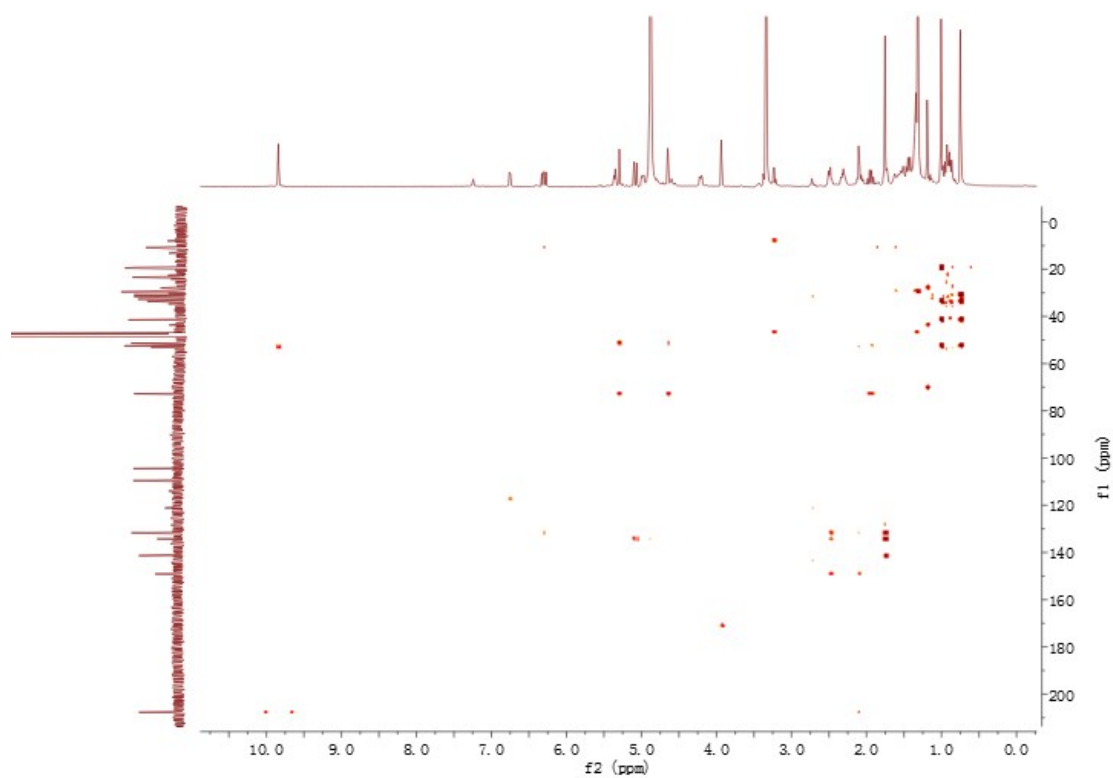

**Fig. S5.** HMBC spectrum of compound **1** (in CD<sub>3</sub>OD)

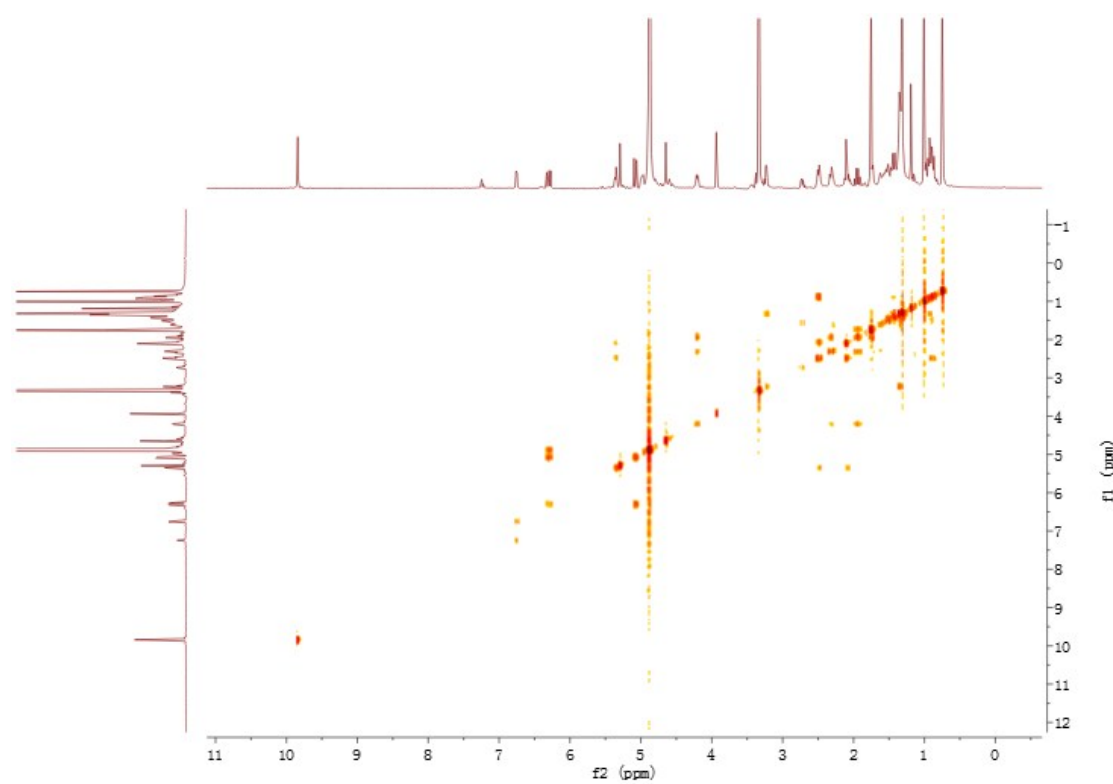

**Fig. S6.** <sup>1</sup>H-<sup>1</sup>H COSY spectrum of compound **1** (in CD<sub>3</sub>OD)



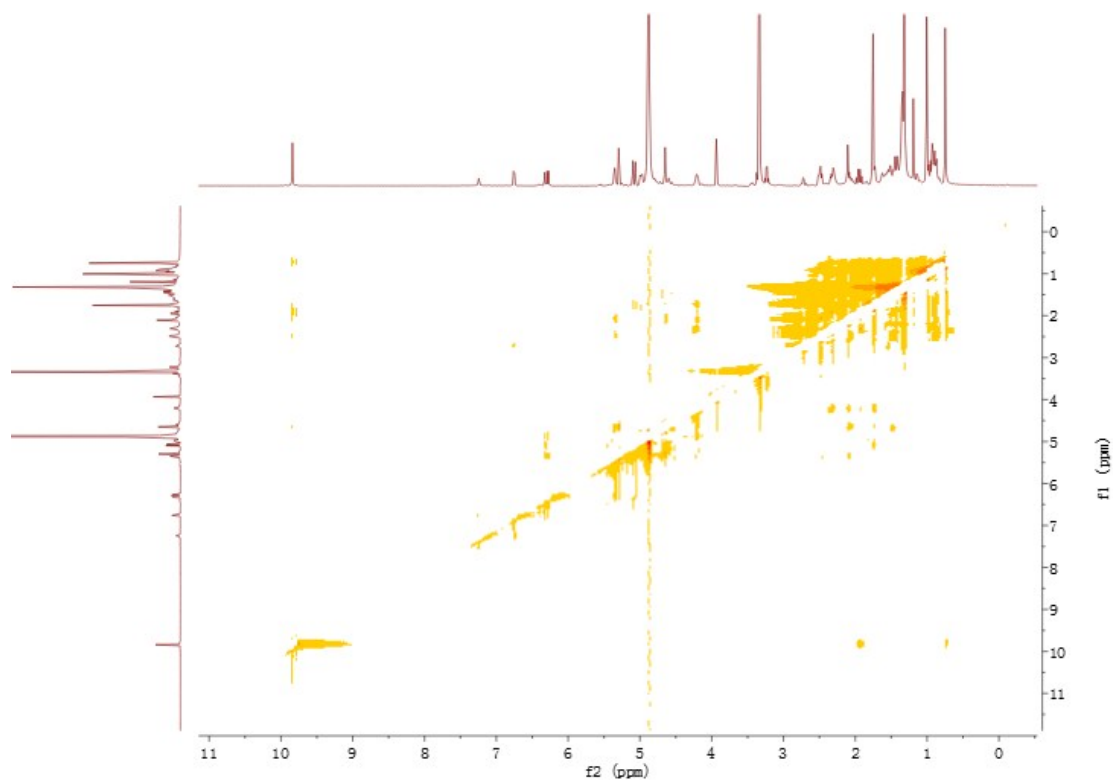

**Fig. S7.** ROESY spectrum of compound **1** (in  $\text{CD}_3\text{OD}$ )

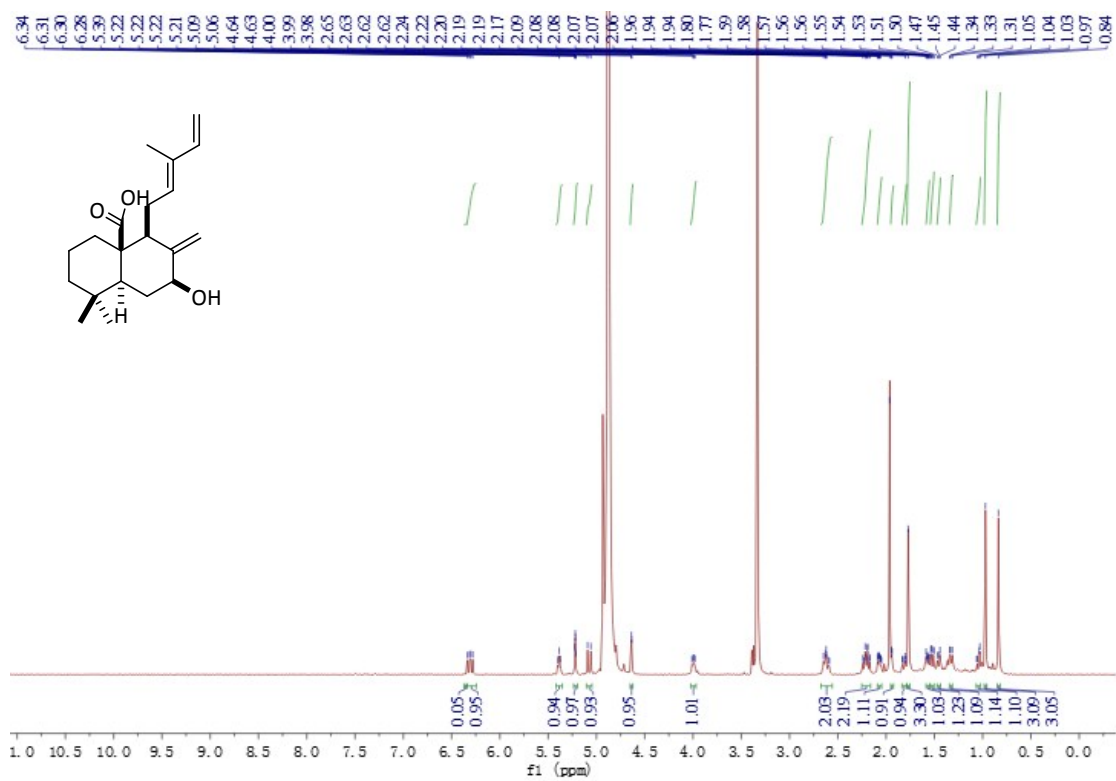

**Fig. S8.**  $^1\text{H}$  NMR spectrum ( $\text{CD}_3\text{OD}$ , 500 MHz) of compound **2**

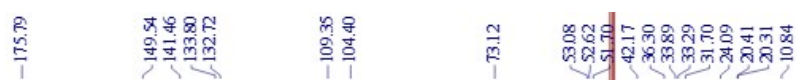

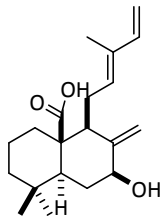

**Fig. S9.**  $^{13}\text{C}$  NMR spectrum ( $\text{CD}_3\text{OD}$ , 125 MHz) of compound **2**

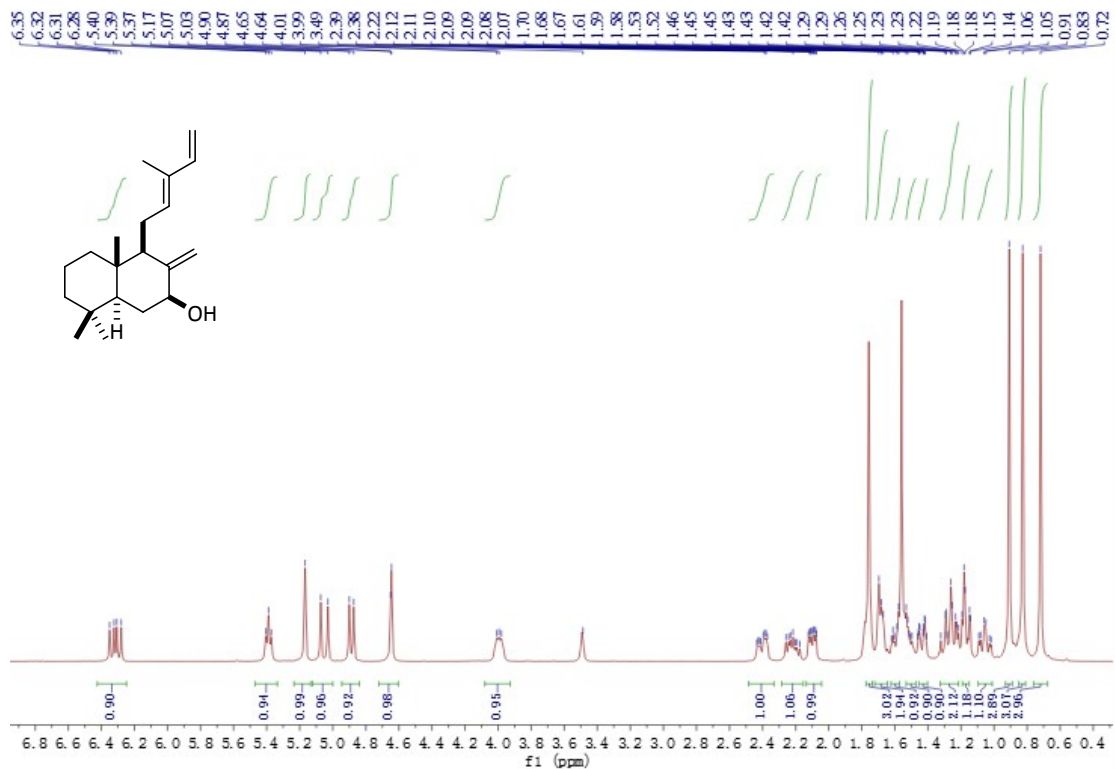

**Fig. S10.**  $^1\text{H}$  NMR spectrum ( $\text{CDCl}_3$ , 400 MHz) of compound **3**

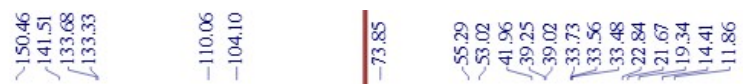

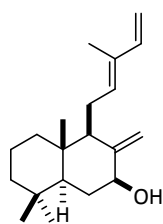

**Fig. S11.**  $^{13}\text{C}$  NMR spectrum ( $\text{CDCl}_3$ , 100 MHz) of compound **3**

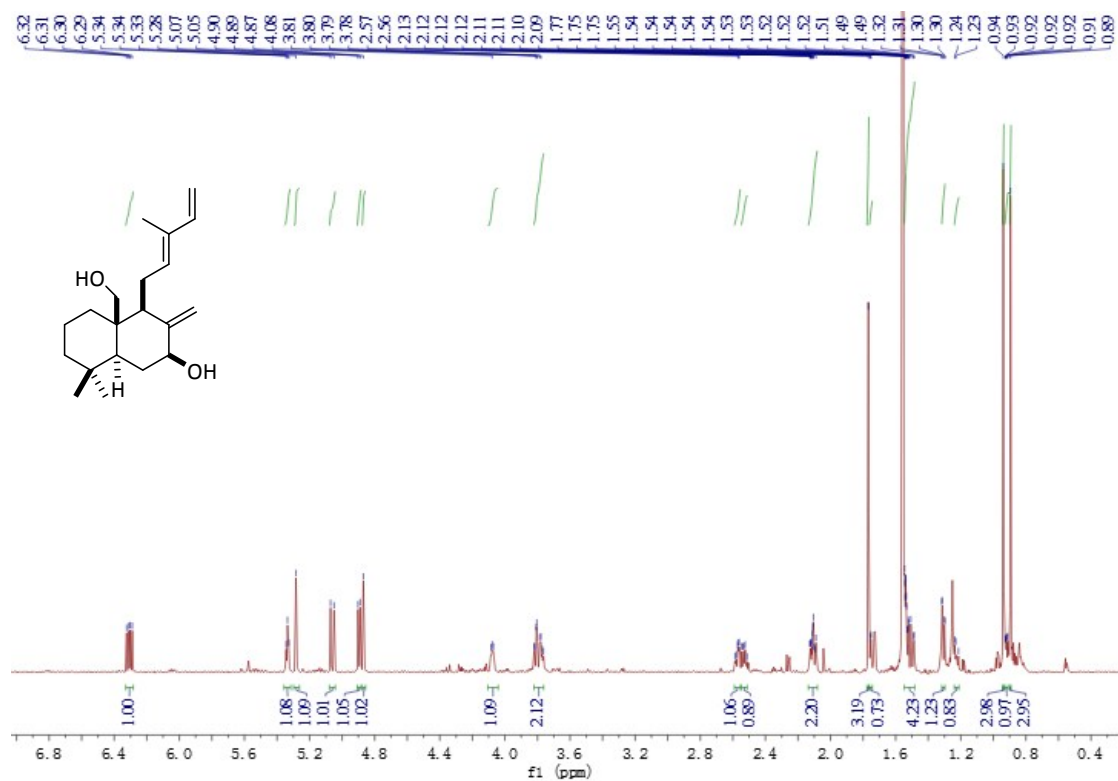

**Fig. S12.**  $^1\text{H}$  NMR spectrum ( $\text{CDCl}_3$ , 800 MHz) of compound **4**

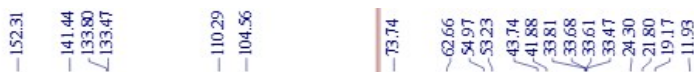

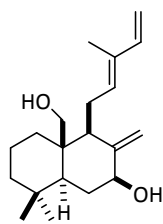

**Fig. S13.**  $^{13}\text{C}$  NMR spectrum ( $\text{CDCl}_3$ , 200 MHz) of compound **4**

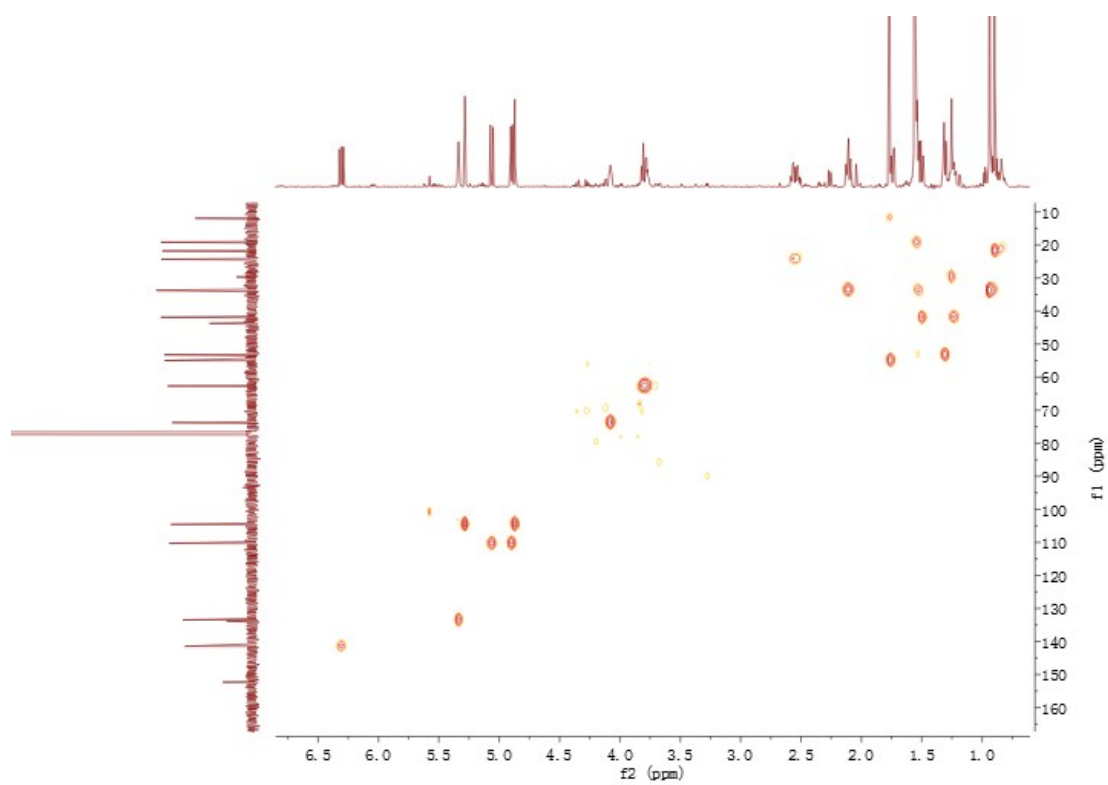

**Fig. S14.** HSQC spectrum of compound **4** (in  $\text{CDCl}_3$ )

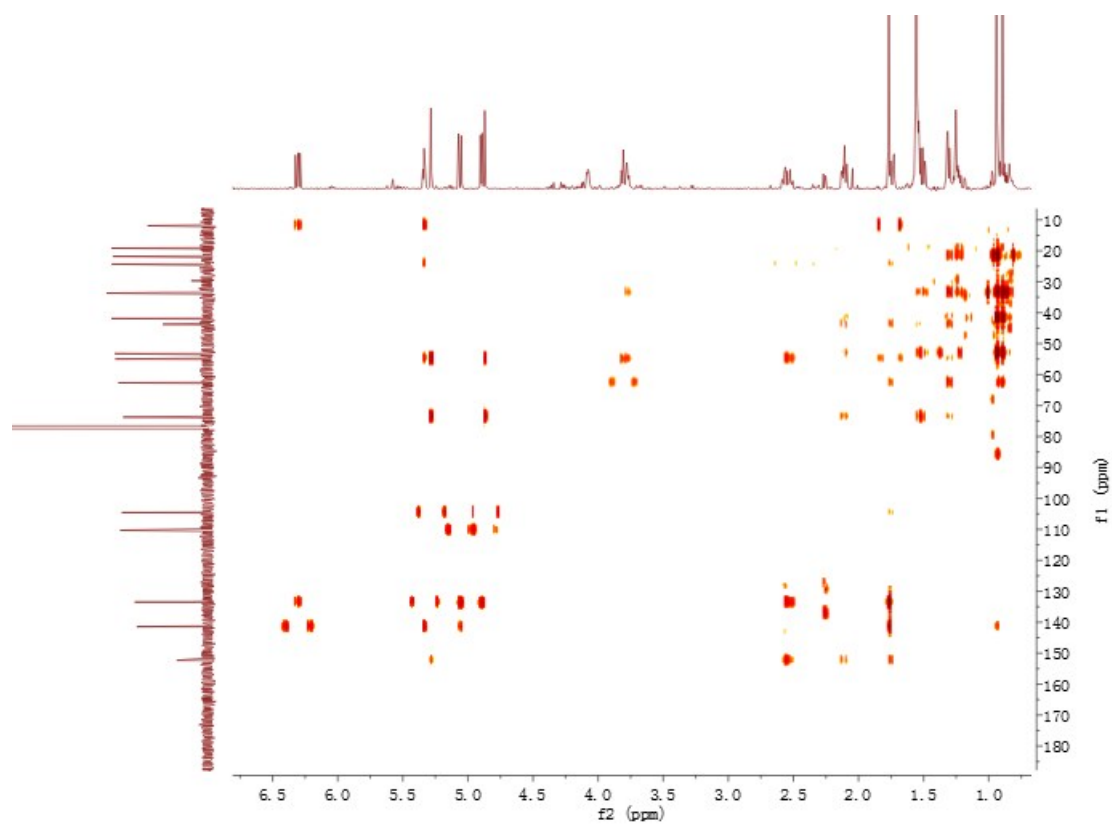

**Fig. S15.** HMBC spectrum of compound **4** (in  $\text{CDCl}_3$ )

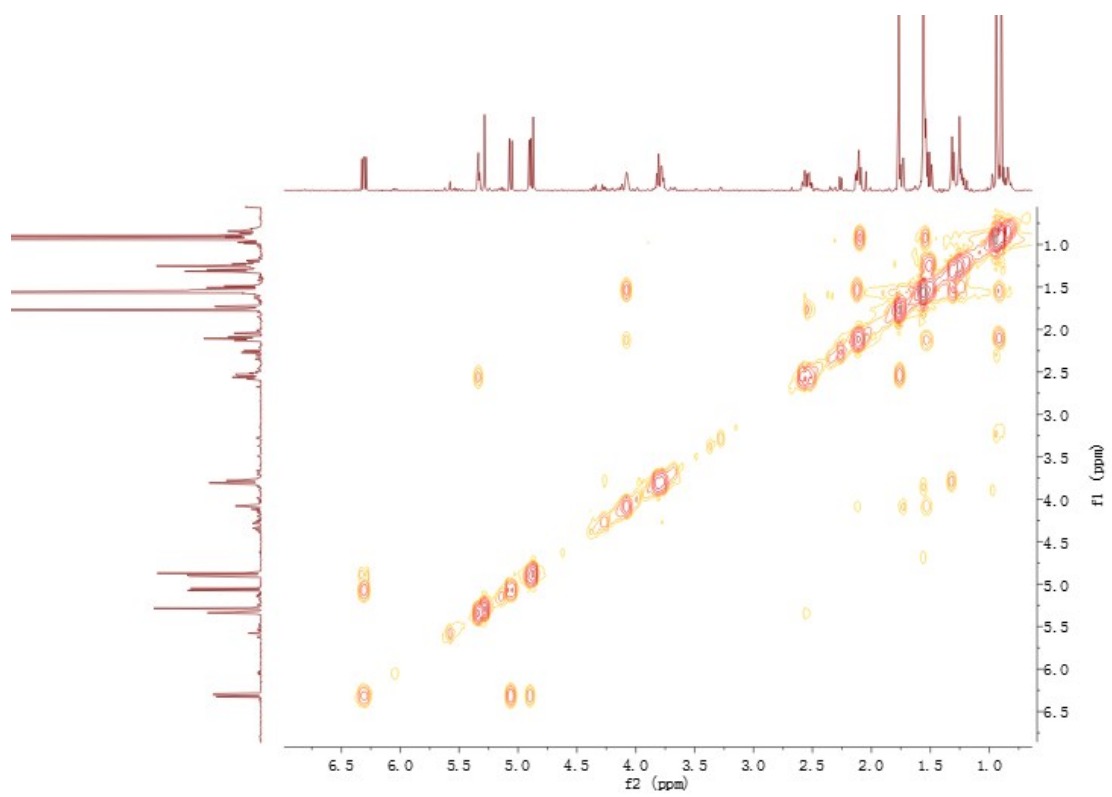

**Fig. S16.**  $^1\text{H}$ - $^1\text{H}$  COSY spectrum of compound **4** (in  $\text{CDCl}_3$ )

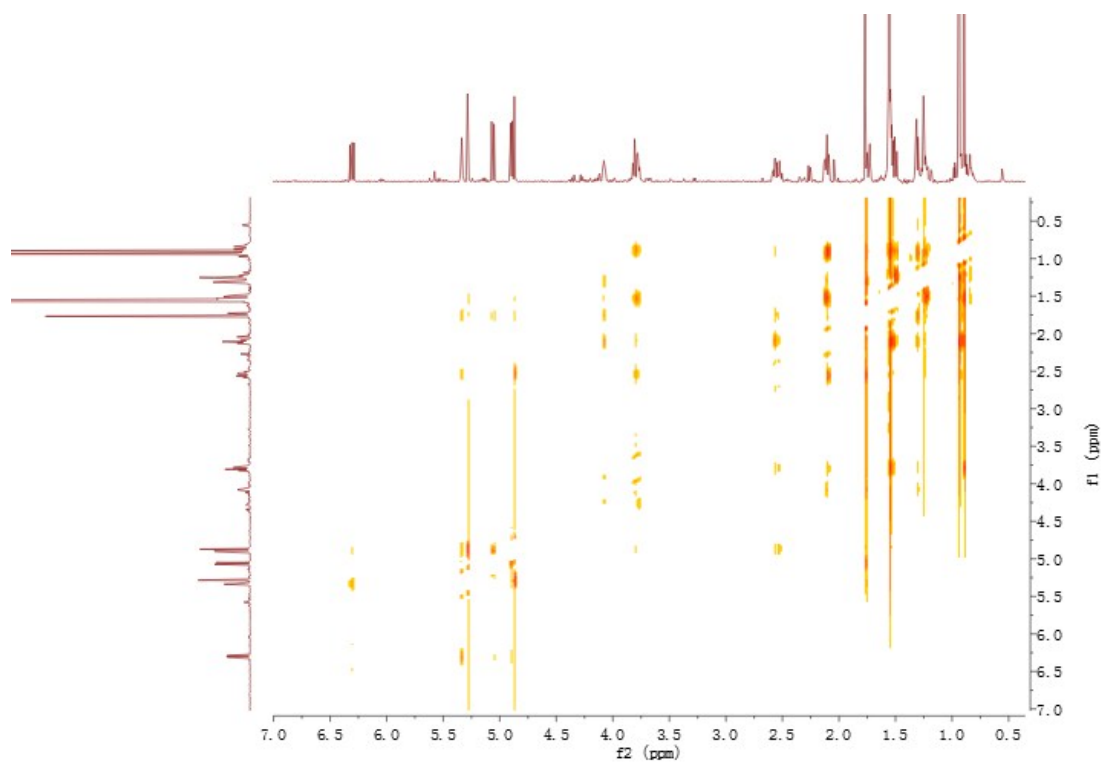

**Fig. S17.** ROESY spectrum of compound **4** (in  $\text{CDCl}_3$ )

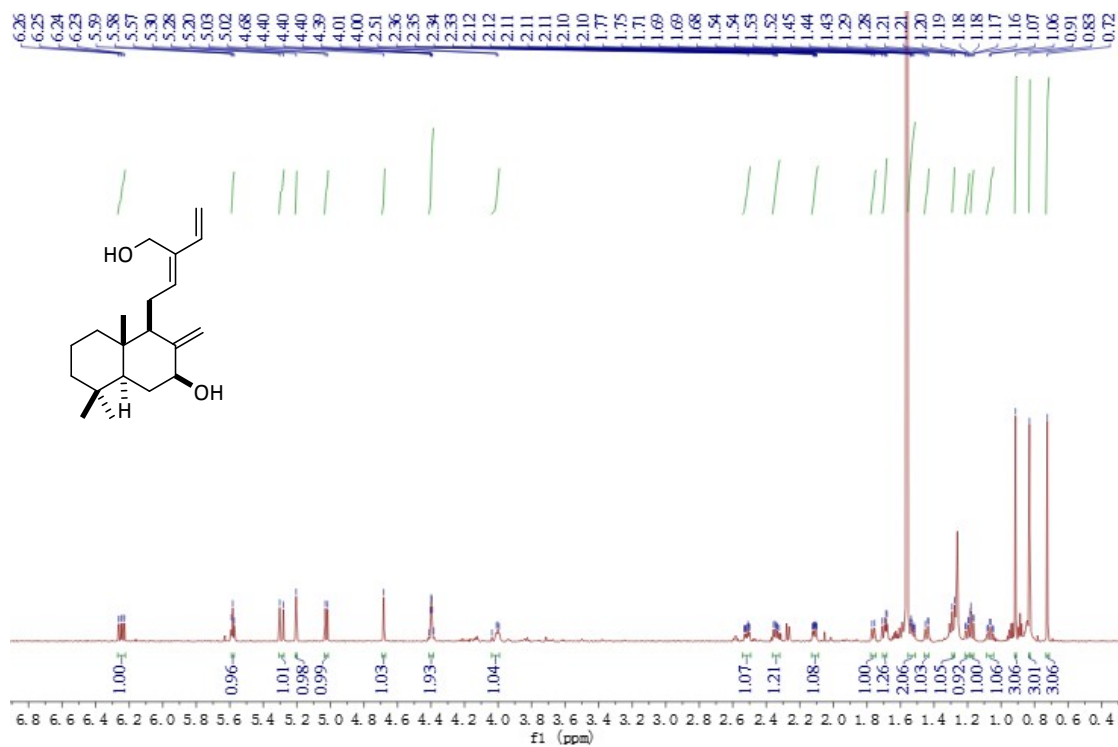

**Fig. S18.**  $^1\text{H}$  NMR spectrum ( $\text{CDCl}_3$ , 800 MHz) of compound **5**

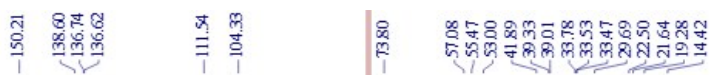

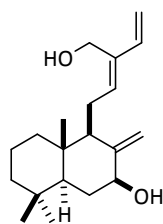

**Fig. S19.**  $^{13}\text{C}$  NMR spectrum ( $\text{CDCl}_3$ , 200 MHz) of compound 5

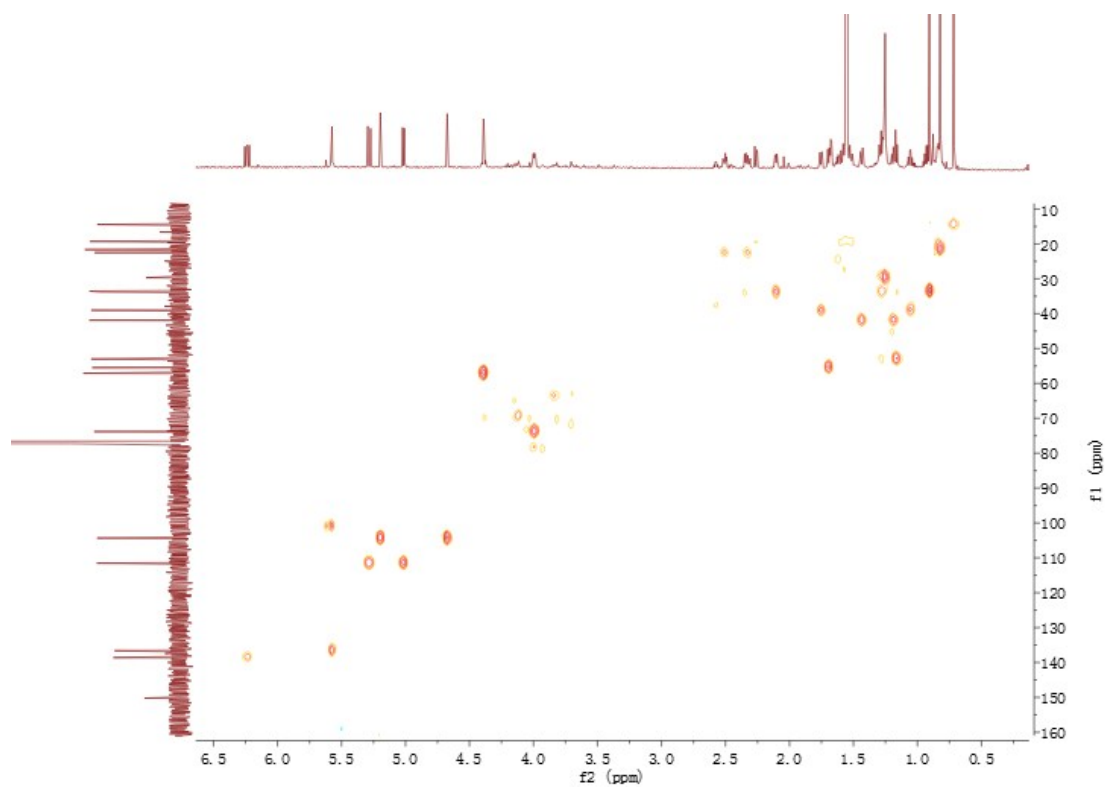

**Fig. S20.** HSQC spectrum of compound 5 (in  $\text{CDCl}_3$ )

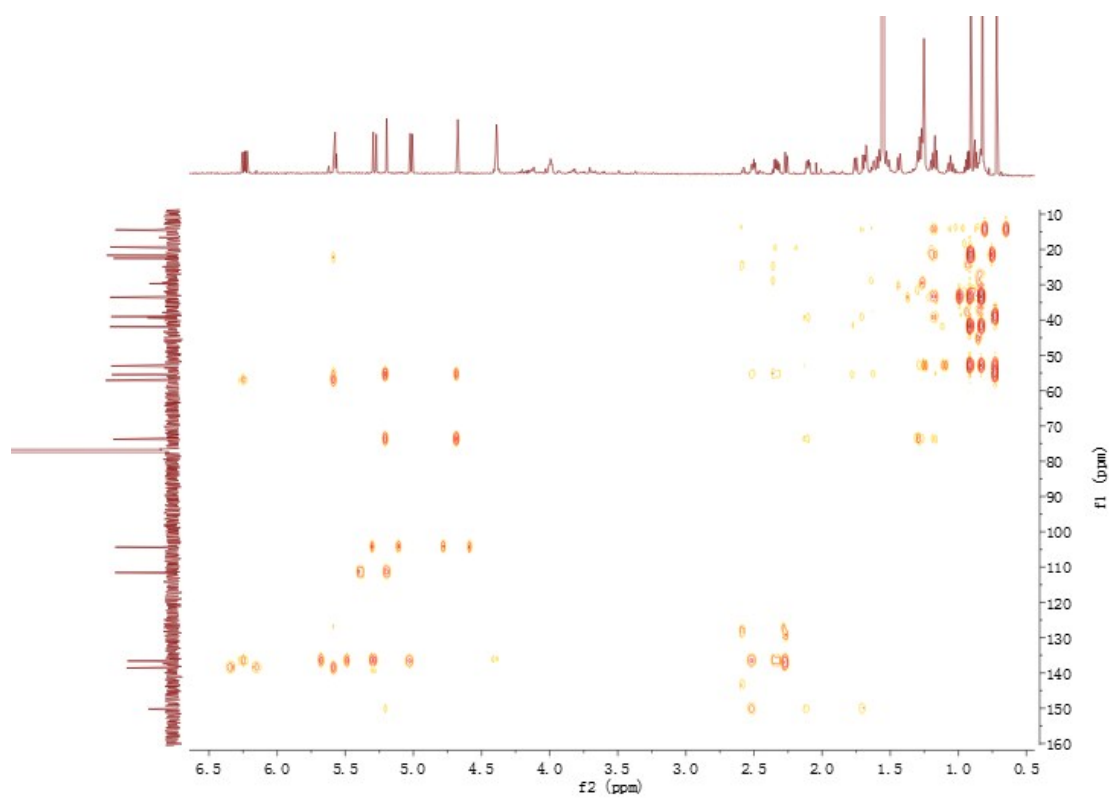

**Fig. S21.** HMBC spectrum of compound **5** (in  $\text{CDCl}_3$ )

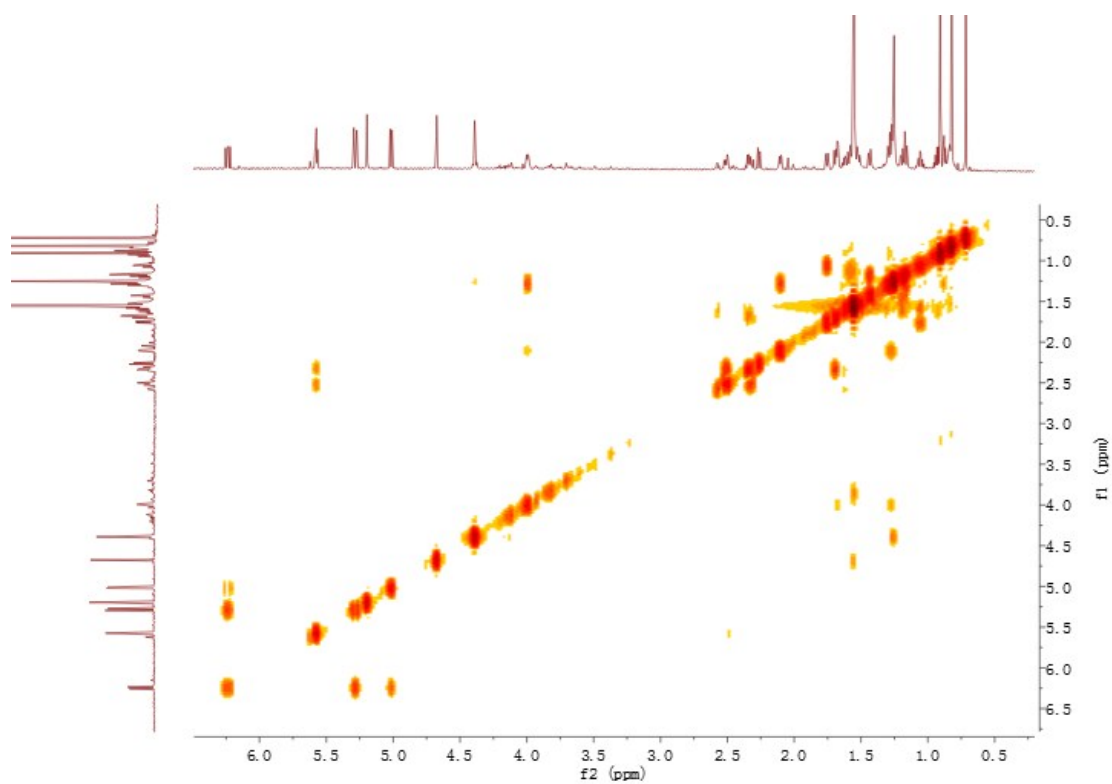

**Fig. S22.**  $^1\text{H}$ - $^1\text{H}$  COSY spectrum of compound **5** (in  $\text{CDCl}_3$ )



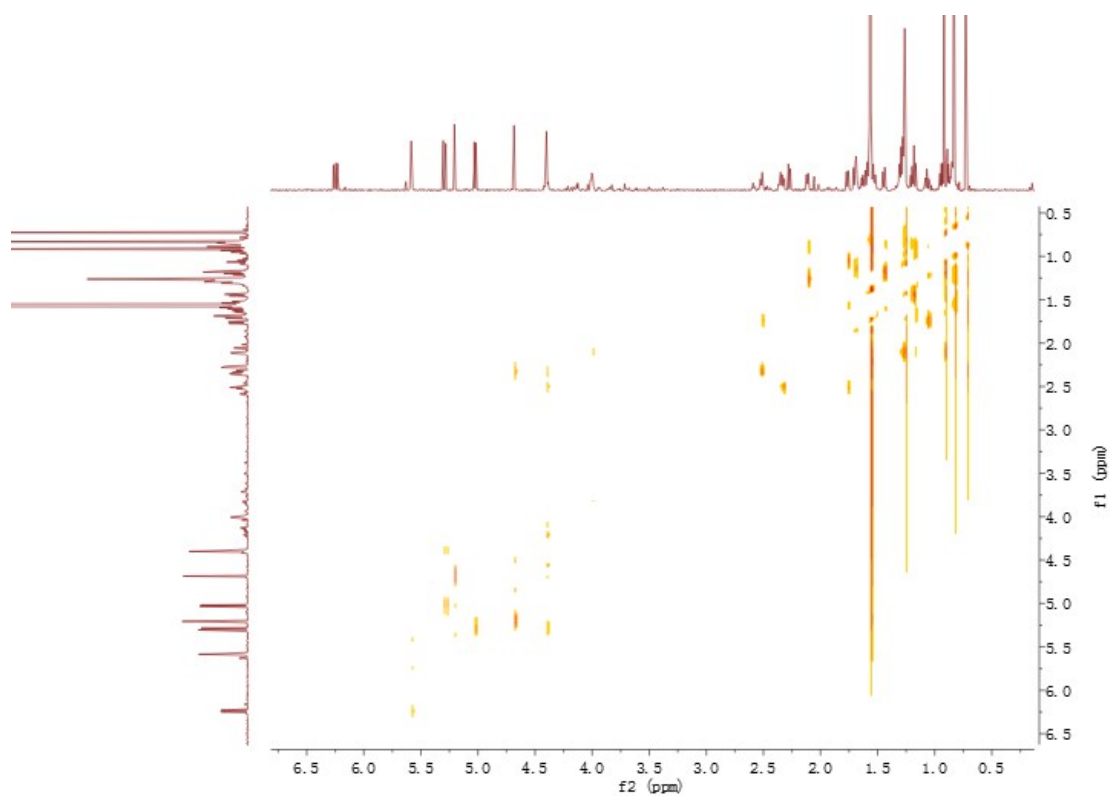

**Fig. S23.** ROESY spectrum of compound **5** (in  $\text{CDCl}_3$ )

### Supplementary References

1. M. S. B. Paget, L. Chamberlin, A. Atrih, S. J. Foster and M. J. Buttner, 1999, *J. Bacteriol.*, **181**, 204–211.
2. K. F. Chater and L. C. Wilde, *Microbiology*, 1980, **116**, 323–334.
3. J. P. Gomez-Escribano and M. J. Bibb, *Microb. Biotechnol.*, 2011, **4**, 207–215.
4. L. Li, Z. Xu, X. Xu, J. Wu, Y. Zhang, X. He, T. Zabriskie and Z. Deng, *ChemBioChem*, 2008, **9**, 1286–1294.
